# Supplementary material
Source: PubMed Central journal article supplement (PMC4669365)
Supplement: 9568bb4b620a28bcffe4ecdde62fd3a2_Pre-and-Post-Program_RET_Survey.pdf [file 9568bb4b620a28bcffe4ecdde62fd3a2_Pre-and-Post-Program_RET_Survey.pdf]

**RET**  
**Pre-/Post-Program Survey**

**Sanford Research**

**ID# of Teacher**

---

## YOUR CURRENT TEACHING

1. Please provide information on the courses that you taught during the most recent school term. Please enter your course schedule below.

| name of course | grade level (majority of students) | number of students | AP or Honors | minutes instruction per week |
|----------------|------------------------------------|--------------------|--------------|------------------------------|
| a.             |                                    |                    |              |                              |
| b.             |                                    |                    |              |                              |
| c.             |                                    |                    |              |                              |
| d.             |                                    |                    |              |                              |
| e.             |                                    |                    |              |                              |
| f.             |                                    |                    |              |                              |

2. Over all your courses, on average, how much emphasis did you give to each of the following goals or objectives?

|                                                                                                                  | None | Minor | Moderate | Major |
|------------------------------------------------------------------------------------------------------------------|------|-------|----------|-------|
| a. Integrating the course curriculum with other subjects or fields of study . . . . .                            | 1    | 2     | 3        | 4     |
| b. Teaching facts, rules, or vocabulary . . . . .                                                                | 1    | 2     | 3        | 4     |
| c. Encouraging students to explore alternative explanations or methods for solving problems . . . . .            | 1    | 2     | 3        | 4     |
| d. Preparing students for taking standardized tests in the subject . . . . .                                     | 1    | 2     | 3        | 4     |
| e. Fully covering the course curriculum as proscribed . . . . .                                                  | 1    | 2     | 3        | 4     |
| f. Understanding the theoretical concepts and ideas underlying scientific or mathematical applications . . . . . | 1    | 2     | 3        | 4     |

3. Approximately how often did you use each of the following teaching methods on average?

|                                                                               | Never | 1 -2 times<br>Per month | 1 - 2 times<br>per week | almost<br>every class | every<br>class |
|-------------------------------------------------------------------------------|-------|-------------------------|-------------------------|-----------------------|----------------|
| a. Lecture or talk to whole class . . . . .                                   | 1     | 2                       | 3                       | 4                     | 5              |
| b. Teacher-led whole class discussions . . . . .                              | 1     | 2                       | 3                       | 4                     | 5              |
| c. Students responding orally to questions on course subject matter . . . . . | 1     | 2                       | 3                       | 4                     | 5              |
| d. Student-led whole group discussions or presentations . . . . .             | 1     | 2                       | 3                       | 4                     | 5              |
| e. Students working together in groups . . . . .                              | 1     | 2                       | 3                       | 4                     | 5              |
| f. Reviewing homework or other assignments . . . . .                          | 1     | 2                       | 3                       | 4                     | 5              |

4. Approximately how often did you have students engage in the following learning activities on average across all of your courses:

|                                                                                                | Never | 1 -2 times<br>Per month | 1 - 2 times<br>per week | almost<br>every class | every<br>class |
|------------------------------------------------------------------------------------------------|-------|-------------------------|-------------------------|-----------------------|----------------|
| a. Work on hands-on activities .....                                                           | 1     | 2                       | 3                       | 4                     | 5              |
| b. Reflect on course material through journal writing .....                                    | 1     | 2                       | 3                       | 4                     | 5              |
| c. Work individually on written work or assignments in a workshop or textbook .....            | 1     | 2                       | 3                       | 4                     | 5              |
| d. Critique/evaluate their own or other students' class-work or homework .....                 | 1     | 2                       | 3                       | 4                     | 5              |
| e. Consider real-world problem relevant to the course and work on ways to address it .....     | 1     | 2                       | 3                       | 4                     | 5              |
| f. Use academic or professional journals to investigate current issues relevant to the field . | 1     | 2                       | 3                       | 4                     | 5              |
| g. Listen to guest speakers or go on field trips relevant to the course material .....         | 1     | 2                       | 3                       | 4                     | 5              |
| h. Investigate possible career opportunities in science, mathematics or technology .....       | 1     | 2                       | 3                       | 4                     | 5              |
| i. Design or implement their own scientific investigation or mathematical theory or proof .    | 1     | 2                       | 3                       | 4                     | 5              |
| j. Use "state of the art" equipment or technology, specify: _____                              | 1     | 2                       | 3                       | 4                     | 5              |

5. Please identify the proportion of your course content which comes from the following sources:

(Percentage)

- a. Text Book \_\_\_\_\_
- b. Kits \_\_\_\_\_
- c. School/district material \_\_\_\_\_
- d. Teacher-adapted \_\_\_\_\_
- e. Teacher-created \_\_\_\_\_
- f. Other, please specify: \_\_\_\_\_

## YOUR ATTITUDES AND BELIEFS ABOUT TEACHING

6. Please indicate how confident you feel about the following aspects of your teaching. If you are a science teacher, answer for how you feel about teaching science; and if you are a mathematics teacher, answer for how you feel about teaching mathematics.

|                                                                                                                            | Not at all | Slightly | Moderately | Very |
|----------------------------------------------------------------------------------------------------------------------------|------------|----------|------------|------|
| a. Your knowledge about the application of the subject to everyday life . . . . .                                          | 1          | 2        | 3          | 4    |
| b. Your ability to advise students about job opportunities in the subject area . . . . .                                   | 1          | 2        | 3          | 4    |
| c. Your ability to advise students about opportunities to receive further training/experience/education in the field . . . | 1          | 2        | 3          | 4    |
| d. Your ability to use inquiry-based instructional practices . . . . .                                                     | 1          | 2        | 3          | 4    |
| e. Your ability to supervise research projects of your students . . . . .                                                  | 1          | 2        | 3          | 4    |
| f. Your ability to make presentations at inservices or professional meetings . . . . .                                     | 1          | 2        | 3          | 4    |

7. To what extent do you feel each of the following statements describes the kind of teacher you are?

|                                                                                                                                                    | Not at all | Slight | Moderate | Great |
|----------------------------------------------------------------------------------------------------------------------------------------------------|------------|--------|----------|-------|
| a. I am motivated to expand on the instructional techniques that I use . . . . .                                                                   | 1          | 2      | 3        | 4     |
| b. I am motivated to change the way I use hands-on materials and manipulatives in my teaching                                                      | 1          | 2      | 3        | 4     |
| c. I am motivated to use more technology in my main field of teaching . . . . .                                                                    | 1          | 2      | 3        | 4     |
| d. I consider myself a “subject matter expert” in my main field of teaching . . . . .                                                              | 1          | 2      | 3        | 4     |
| e. I consider preparing students for the kinds of expectations they will encounter in a work setting as an important part of my job . . . . .      | 1          | 2      | 3        | 4     |
| f. I believe I can truly make a difference in the lives of my students in terms of their choices for further education and their careers . . . . . | 1          | 2      | 3        | 4     |

8. What do you consider to be your greatest strengths as a teacher? Please be as specific as you can. Think about both areas of content mastery and instructional strategies when answering this question.

---

---

---

9. What areas of your teaching do you think need improvement? Think about both areas of content mastery and instructional strategies when answering this question.

---

---

---

## **YOUR BACKGROUND AND EXPERIENCE**

10. Including this school year, how many years have you been employed as a teacher?

- a. In total \_\_\_\_\_
- b. As a math teacher \_\_\_\_\_
- c. As a science teacher \_\_\_\_\_
- d. In a high school \_\_\_\_\_
- e. In a middle school \_\_\_\_\_
- f. In an elementary school \_\_\_\_\_
- g. Other, please specify \_\_\_\_\_

11. Do you have a teaching certificate in the state and/or city in which you are currently teaching?

Yes \_\_\_\_\_ No \_\_\_\_\_

12. During the last 12 months, have you participated in any professional development activities that focused on the following topics?

- a. In-depth study of your main subject area Yes \_\_\_\_\_ No \_\_\_\_\_
- b. Methods of teaching your main subject area Yes \_\_\_\_\_ No \_\_\_\_\_
- c. Applications of technology to education Yes \_\_\_\_\_ No \_\_\_\_\_
- d. Other related areas, specify: Yes \_\_\_\_\_ No \_\_\_\_\_

---

13. During the past 12 months, have you been involved in the following activities related to your teaching?

|                                                                                                      | Yes | No |
|------------------------------------------------------------------------------------------------------|-----|----|
| a. Served as department chair .....                                                                  | 1   | 2  |
| b. Developed or piloted new curricula .....                                                          | 1   | 2  |
| c. Held a leadership position in a state or national professional organization .....                 | 1   | 2  |
| d. Formally mentored a new or beginning teacher .....                                                | 1   | 2  |
| e. Supervised student teachers .....                                                                 | 1   | 2  |
| f. Conducted inservices or workshops for teachers .....                                              | 1   | 2  |
| g. Made observational visits to other schools .....                                                  | 1   | 2  |
| h. Made presentation(s) to non-teaching groups (e.g., school board, parents, community groups) ..... | 1   | 2  |
| i. Conducted individual or collaborative research on a topic of interest to you .....                | 1   | 2  |
| j. Represented the school or district on an instructional reform project .....                       | 1   | 2  |
| k. Other, specify _____ .....                                                                        | 1   | 2  |

14. Not counting this summer program, have you participated in any professional development activities either in a laboratory, research or industrial setting in the last five years? If so, please describe this experience by providing the following information:

| name of program & sponsoring agency | type of setting (gov., univ. lab, industry) | dates and duration of program | type of work involved |
|-------------------------------------|---------------------------------------------|-------------------------------|-----------------------|
|                                     |                                             |                               |                       |
|                                     |                                             |                               |                       |
|                                     |                                             |                               |                       |

15. During the past five years, have you been employed in a laboratory, research, or industrial setting that was relevant to your work as a science or mathematics teacher?

Yes \_\_\_\_\_ No \_\_\_\_\_

16. Please describe your post-secondary education by completing the chart below:

| DEGREE(S) HELD                 | YEAR | INSTITUTION | MAJOR | MINOR |
|--------------------------------|------|-------------|-------|-------|
| Bachelor's      Y   N          |      |             |       |       |
| Master's        Y   N          |      |             |       |       |
| Doctorate       Y   N          |      |             |       |       |
| Other (specify) Y   N<br>_____ |      |             |       |       |

17. Are you currently working towards an advanced degree? If yes, please specify:

Yes \_\_\_\_\_ No \_\_\_\_\_  
 Degree: \_\_\_\_\_ Institution: \_\_\_\_\_ Area: \_\_\_\_\_

## TEACHER CHARACTERISTICS

18. What is your sex?    Male \_\_\_\_\_                  Female \_\_\_\_\_

19. Which best describes you:

- a. American-Indian or Native Alaskan ..... 1
- b. Asian or Pacific Islander ..... 2
- c. Black, non-hispanic ..... 3
- d. Hispanic ..... 4
- e. White, non-Hispanic ..... 5

*Thank you!*

**RET**  
**Pre-/Post-Program Survey**  
**Section II**



# YOUR CURRENT TEACHING

1. Over all your courses, on average, how much emphasis did you give to each of the following goals or objectives?
 

|                                                   | None | Minor | Moderate | Major |
|---------------------------------------------------|------|-------|----------|-------|
| a. Enhancement of written communication skills    | 1    | 2     | 3        | 4     |
| b. Developing of oral communication skills. . . . | 1    | 2     | 3        | 4     |
| c. Improving hands-on laboratory skills. . . . .  | 1    | 2     | 3        | 4     |
  
2. Approximately how often did you use each of the following teaching methods on average?
 

|                                                                                                         | Never | 1 -2 times<br>Per month | 1 - 2 times<br>per week | almost<br>every class | every<br>class |
|---------------------------------------------------------------------------------------------------------|-------|-------------------------|-------------------------|-----------------------|----------------|
| a. Students developing laboratory skills through experimentation or research projects. . . . .          | 1     | 2                       | 3                       | 4                     | 5              |
| b. Students writing scientifically (i.e. laboratory reports, scientific journals, research papers, etc) | 1     | 2                       | 3                       | 4                     | 5              |
| c. Students designing and/or inquiring about experimental design and research. . . . .                  | 1     | 2                       | 3                       | 4                     | 5              |
  
3. Approximately how often did you have students engage in the following learning activities on average across all of your courses:
 

|                                                                                                                                                     | Never | 1 -2 times<br>Per month | 1 - 2 times<br>per week | almost<br>every class | every<br>class |
|-----------------------------------------------------------------------------------------------------------------------------------------------------|-------|-------------------------|-------------------------|-----------------------|----------------|
| a. Communicate their understanding of scientific concepts in written form (i.e. laboratory reports, journal entries, research papers, etc). . . . . | 1     | 2                       | 3                       | 4                     | 5              |
| b. Communicate scientific concepts orally (i.e. presentations, oral examinations, etc). . . . .                                                     | 1     | 2                       | 3                       | 4                     | 5              |
  
4. Approximately how many students do you have in your classroom during a typical lesson?
 

a. 0 - 10      b. 11 - 20      c. 21 - 30      d. Over 30
  
5. What is the approximate student population of the school in which you are currently teaching?
 

a. 0 - 250      b. 251 - 500      c. 501 - 750      d. 751 - 1000      e. Over 1000
  
6. According to the NCES locale table attached to the end of this survey, which of the following would best describe the school district in which you are currently employed?
 

a. City, midsize      b. City, small      c. Town, fringe      d. Town, distant  
e. Town, remote      f. Rural, fringe      g. Rural, distant      h. Rural, remote

## YOUR ATTITUDES AND BELIEFS ABOUT TEACHING

7. To what extent do you feel each of the following statements describes the kind of teacher you are?

|                                                                                                                                                 | Not at all | Slight | Moderate | Great |
|-------------------------------------------------------------------------------------------------------------------------------------------------|------------|--------|----------|-------|
| a. I am confident in my ability as a scientist to prepare my students for a career in the field of science and engineering. . . . .             | 1          | 2      | 3        | 4     |
| b. I believe that I have the training and knowledge necessary to develop relevant hands-on and research-based projects for my students. . . . . | 1          | 2      | 3        | 4     |
| c. I am satisfied with my current position as a middle or high school science teacher. . . . .                                                  | 1          | 2      | 3        | 4     |
| d. I plan on continuing my career as an educator for many years to come. . . . .                                                                | 1          | 2      | 3        | 4     |

Thank you!

### NCES's locale codes

|                                                                                                                                                                                                          |                                |                                                                                                                                                                                                                                                                                                                                                                                                  |                    |
|----------------------------------------------------------------------------------------------------------------------------------------------------------------------------------------------------------|--------------------------------|--------------------------------------------------------------------------------------------------------------------------------------------------------------------------------------------------------------------------------------------------------------------------------------------------------------------------------------------------------------------------------------------------|--------------------|
| <b>City, midsize</b><br>Sioux Falls                                                                                                                                                                      | <b>Town, fringe</b><br>Douglas | <b>Town, distant</b><br>Harrisburg<br>Lead-Deadwood<br>Vermillion<br>Canton<br>Dell Rapids<br>Douglas                                                                                                                                                                                                                                                                                            |                    |
| <b>City, small</b><br>Rapid City                                                                                                                                                                         |                                |                                                                                                                                                                                                                                                                                                                                                                                                  |                    |
| <b>Town, remote</b><br>Aberdeen<br>Belle Fourche<br>Brookings<br>Hot Springs<br>Huron<br>Milbank<br>Mitchell<br>Mobridge<br>Pierre<br>Redfield<br>Spearfish<br>Stanley<br>Watertown<br>Winner<br>Yankton |                                | <b>Rural, distant</b><br>Baltic<br>Canistota<br>Chester Area<br>Colome Consolidated<br>Custer<br>Deubrook Area<br>Elk Point-Jefferson<br>Ethan<br>Garretson<br>Gayville-Volin<br>Hanson<br>Hill City<br>Hurley<br>Lennox<br>Marion<br>Montrose<br>Mount Vernon<br>New Underwood<br>Oldham-Ramona<br>Parker<br>Rutland<br>Sioux Valley<br>Smee<br>Tri-Valley<br>Warner<br>Waverly<br>West Central |                    |
| <b>Rural, fringe</b><br>Brandon Valley<br>Dakota Valley<br>Madison Central<br>Meade<br>Tea Area                                                                                                          |                                |                                                                                                                                                                                                                                                                                                                                                                                                  |                    |
| <b>Rural, remote</b>                                                                                                                                                                                     |                                |                                                                                                                                                                                                                                                                                                                                                                                                  |                    |
| Agar-Blunt-Onida                                                                                                                                                                                         | Eagle Butte                    | Howard                                                                                                                                                                                                                                                                                                                                                                                           | Rosholt            |
| Alcester-Hudson                                                                                                                                                                                          | Edgemont                       | Ipswich                                                                                                                                                                                                                                                                                                                                                                                          | Sanborn Central    |
| Andes Central                                                                                                                                                                                            | Edmunds                        | Irene-Wakonda                                                                                                                                                                                                                                                                                                                                                                                    | Scotland           |
| Arlington                                                                                                                                                                                                | Elkton                         | Iroquois                                                                                                                                                                                                                                                                                                                                                                                         | Selby Area         |
| Armour                                                                                                                                                                                                   | Estelline                      | Jones County                                                                                                                                                                                                                                                                                                                                                                                     | Sisseton           |
| Avon                                                                                                                                                                                                     | Eureka                         | Kadoka area                                                                                                                                                                                                                                                                                                                                                                                      | South Central      |
| Bennett County                                                                                                                                                                                           | Faith                          | Kimball                                                                                                                                                                                                                                                                                                                                                                                          | Stickney           |
| Beresford                                                                                                                                                                                                | Faulkton                       | Lake Preston                                                                                                                                                                                                                                                                                                                                                                                     | Summit             |
| Bison                                                                                                                                                                                                    | Flandreau                      | Langford                                                                                                                                                                                                                                                                                                                                                                                         | Timber Lake        |
| Bon Homme                                                                                                                                                                                                | Florence                       | Lemmon                                                                                                                                                                                                                                                                                                                                                                                           | Todd County        |
| Bowdle                                                                                                                                                                                                   | Frederick                      | Leola                                                                                                                                                                                                                                                                                                                                                                                            | Tripp-Delmont      |
| Bridgewater-Emery                                                                                                                                                                                        | Freeman                        | Lyman                                                                                                                                                                                                                                                                                                                                                                                            | Viborg             |
| Britton-Hecla                                                                                                                                                                                            | Gettysburg                     | McCook Central                                                                                                                                                                                                                                                                                                                                                                                   | Wagner Community   |
| Burke                                                                                                                                                                                                    | Grant-Deuel                    | McIntosh                                                                                                                                                                                                                                                                                                                                                                                         | Wall               |
| Castlewood                                                                                                                                                                                               | Gregory                        | McLaughlin                                                                                                                                                                                                                                                                                                                                                                                       | Waubay             |
| Centerville                                                                                                                                                                                              | Groton                         | Menno                                                                                                                                                                                                                                                                                                                                                                                            | Webster Area       |
| Chamberlain                                                                                                                                                                                              | Haakon                         | Miller Area                                                                                                                                                                                                                                                                                                                                                                                      | Wessington Springs |
| Clark                                                                                                                                                                                                    | Hamlin                         | Newell                                                                                                                                                                                                                                                                                                                                                                                           | White Lake         |
| Colman-Egan                                                                                                                                                                                              | Harding County                 | Northwestern Area                                                                                                                                                                                                                                                                                                                                                                                | White River        |
| Corsica                                                                                                                                                                                                  | Henry                          | Oelrichs                                                                                                                                                                                                                                                                                                                                                                                         | Willow Lake        |
| De Smet                                                                                                                                                                                                  | Herreid                        | Parkston                                                                                                                                                                                                                                                                                                                                                                                         | Wilmot             |
| Deuel                                                                                                                                                                                                    | Highmore-Herrold               | Plankinton                                                                                                                                                                                                                                                                                                                                                                                       | Wolsey-Wessington  |
| Doland                                                                                                                                                                                                   | Hitchcock-Tulare               | Platte-Geddes                                                                                                                                                                                                                                                                                                                                                                                    | Woonsocket         |
| Dupree                                                                                                                                                                                                   | Hoven                          |                                                                                                                                                                                                                                                                                                                                                                                                  |                    |
