# Supplementary material
Source: PubMed Central journal article supplement (PMC4669365)
Supplement: Program_Evaluation_Survey.pdf [file Program_Evaluation_Survey.pdf]

**RET**  
**Program Evaluation Survey**

**Sanford Research**

**ID# of Teacher**

---

1. To what extent, if any, did you engage in each of the following types of activities during the RET?

|                                                                                                                                                       | Not at all | Small extent | Moderate extent | Great extent |
|-------------------------------------------------------------------------------------------------------------------------------------------------------|------------|--------------|-----------------|--------------|
| a. I observed research activities that others were doing .....                                                                                        | 1          | 2            | 3               | 4            |
| b. I attended lectures that presented information about current work in the field .....                                                               | 1          | 2            | 3               | 4            |
| c. I collaborated in ongoing research with regular staff from the organization .....                                                                  | 1          | 2            | 3               | 4            |
| d. I designed and implemented my own research or investigation under supervision from a mentor .....                                                  | 1          | 2            | 3               | 4            |
| e. I assisted in the process of developing, modifying, or documenting applications of science, mathematics, or technology for my mentor/sponsor ..... | 1          | 2            | 3               | 4            |
| f. I operated instruments, equipment, and other technologies .....                                                                                    | 1          | 2            | 3               | 4            |
| g. I participated in conducting research or collecting data out in the field .....                                                                    | 1          | 2            | 3               | 4            |
| h. I read academic literature or journal articles ..                                                                                                  | 1          | 2            | 3               | 4            |
| i. I wrote about the work that I was doing and shared it with my mentor(s) or other professionals at the site .....                                   | 1          | 2            | 3               | 4            |
| j. I wrote a paper that was suitable for submission to a professional journal .....                                                                   | 1          | 2            | 3               | 4            |
| k. I gave a presentation on what I learned or an activity that I developed .....                                                                      | 1          | 2            | 3               | 4            |
| l. I accessed information from the Internet that contributed to the work I was doing .....                                                            | 1          | 2            | 3               | 4            |

2. To what extent, if any, do you feel that you experienced each of the following types of learning as a result of your participation in the RET?

|                                                                                                                                                         | Not at all | Small extent | Moderate extent | Great extent |
|---------------------------------------------------------------------------------------------------------------------------------------------------------|------------|--------------|-----------------|--------------|
| a. I gained greater understanding of the applications of science, mathematics, or technology in everyday life .....                                     | 1          | 2            | 3               | 4            |
| b. I acquired greater understanding of fundamental concepts in science or mathematics .....                                                             | 1          | 2            | 3               | 4            |
| c. I became familiar with new materials and equipment that I can use in my teaching .....                                                               | 1          | 2            | 3               | 4            |
| d. I learned about innovative ways to use standard materials and equipment in my field .....                                                            | 1          | 2            | 3               | 4            |
| e. I increased my knowledge of current issues in scientific or mathematical research .....                                                              | 1          | 2            | 3               | 4            |
| f. I gained a greater appreciation of the difficulties some students encounter when learning science or mathematics .....                               | 1          | 2            | 3               | 4            |
| g. I better understand how collaborative inquiry can be done successfully .....                                                                         | 1          | 2            | 3               | 4            |
| h. I became more proficient at using the Internet for communicating with colleagues and accessing information that will be helpful in my teaching ..... | 1          | 2            | 3               | 4            |
| i. I learned about magazines and professional journals that will be relevant to me as a teacher .....                                                   | 1          | 2            | 3               | 4            |
| j. I expanded my knowledge of how to use computers in my teaching .....                                                                                 | 1          | 2            | 3               | 4            |
| k. I increased my knowledge of careers that utilize science, mathematics, or technology ..                                                              | 1          | 2            | 3               | 4            |

3. Please indicate to what extent you were satisfied with the RET experience in each of the following areas:

|                                                                                                             | Not at all | Small extent | Moderate extent | Great extent |
|-------------------------------------------------------------------------------------------------------------|------------|--------------|-----------------|--------------|
| a. The materials and information you received before you began the work experience . . . . .                | 1          | 2            | 3               | 4            |
| b. The orientation you received when you began the work experience . . . . .                                | 1          | 2            | 3               | 4            |
| c. The expertise and helpfulness of the RET management in answering questions and problem solving . . . . . | 1          | 2            | 3               | 4            |
| d. Your relationship with your mentor . . . . .                                                             | 1          | 2            | 3               | 4            |
| e. The opportunity to participate as a member of a team . . . . .                                           | 1          | 2            | 3               | 4            |
| f. The opportunity to ask questions of the staff at the worksite . . . . .                                  | 1          | 2            | 3               | 4            |
| g. The opportunity to interact and discuss issues with other employees at the site . . . . .                | 1          | 2            | 3               | 4            |
| h. The availability and quality of resources, materials and equipment . . . . .                             | 1          | 2            | 3               | 4            |

4. Please rate the extent to which your mentor met your expectations in each of the following areas:

|                                                                                                                               | Not at all | Small extent | Moderate extent | Great extent |
|-------------------------------------------------------------------------------------------------------------------------------|------------|--------------|-----------------|--------------|
| a. Your mentor's preparation for your arrival . . . . .                                                                       | 1          | 2            | 3               | 4            |
| b. Your mentor's knowledge and support of the goals of the RET . . . . .                                                      | 1          | 2            | 3               | 4            |
| c. Your mentor's knowledge of the roles and responsibilities of teachers in your field . . . . .                              | 1          | 2            | 3               | 4            |
| d. Your mentor's interest in helping you develop a plan to improve education in science, mathematics, or technology . . . . . | 1          | 2            | 3               | 4            |
| e. Your mentor's commitment to providing opportunities for you to learn and gain expertise in new areas . . . . .             | 1          | 2            | 3               | 4            |
| f. Your mentor's ability to communicate information and expectations clearly . . . . .                                        | 1          | 2            | 3               | 4            |

5. To what extent, if any, was your RET experience successful in each of the following ways?

|                                                                                                                              | Not at all | Small extent | Moderate extent | Great extent |
|------------------------------------------------------------------------------------------------------------------------------|------------|--------------|-----------------|--------------|
| a. It was responsive to your professional development needs .....                                                            | 1          | 2            | 3               | 4            |
| b. It was appropriate to your knowledge, skills, and interests .....                                                         | 1          | 2            | 3               | 4            |
| c. It provided opportunities to engage in inquiry/research activities that you will be able to adapt for classroom use ..... | 1          | 2            | 3               | 4            |
| d. The job assignments were clearly defined ...                                                                              | 1          | 2            | 3               | 4            |
| e. The work was enjoyable and stimulating to you .....                                                                       | 1          | 2            | 3               | 4            |
| f. The scope of the project was appropriate for the time you were on site .....                                              | 1          | 2            | 3               | 4            |

6. To what extent do you agree or disagree with each of the following statements concerning the impact of the RET program on you personally?

|                                                                                                                    | Not at all | Small extent | Moderate extent | Great extent |
|--------------------------------------------------------------------------------------------------------------------|------------|--------------|-----------------|--------------|
| a. It increased my confidence in myself as a teacher .....                                                         | 1          | 2            | 3               | 4            |
| b. It elevated my enthusiasm for teaching .....                                                                    | 1          | 2            | 3               | 4            |
| c. It increased my interest in research and the ways that science, mathematics, or technology can be applied ..... | 1          | 2            | 3               | 4            |
| d. It stimulated me to think about ways I can improve my teaching .....                                            | 1          | 2            | 3               | 4            |
| e. I believe I will be a more effective teacher ..                                                                 | 1          | 2            | 3               | 4            |
| f. It increased my interest and ability in networking with teachers and other professionals .....                  | 1          | 2            | 3               | 4            |
| g. It increased my motivation to seek out other experimental professional development activities .....             | 1          | 2            | 3               | 4            |
| h. It increased my commitment to learning and seeking new ideas on my own .....                                    | 1          | 2            | 3               | 4            |
| i. It changed my career direction .....                                                                            | 1          | 2            | 3               | 4            |

7. In your opinion, what was the primary professional or personal benefit of the RET experience?

---

---

---

---

---

8. Do you think your RET experience will have an impact on student achievement? How?

---

---

---

---

---

9. Were there any particular aspects of the RET experience that you feel should have been handled differently or could be improved? If so, please describe:

---

---

---

---

---

10. As a professional development program for teachers, how would you rate the RET program in which you participated?

- Poor ..... 1
- Fair ..... 2
- Good ..... 3
- Very Good ..... 4
- Excellent ..... 5

11. Will you recommend the RET program to your teacher colleagues?

- No ..... 1
- Not sure ..... 2
- Probably ..... 3
- Definitely ..... 4

**YOUR BACKGROUND AND EXPERIENCE**

12. Please provide information on the courses that you taught during the most recent school term. Please enter your course schedule below.

| name of course | grade level (majority of students) | number of students | AP or Honors | minutes instruction per week |
|----------------|------------------------------------|--------------------|--------------|------------------------------|
| a.             |                                    |                    |              |                              |
| b.             |                                    |                    |              |                              |
| c.             |                                    |                    |              |                              |
| d.             |                                    |                    |              |                              |
| e.             |                                    |                    |              |                              |
| f.             |                                    |                    |              |                              |

13. Including this school year, how many years have you been employed as a teacher?

- a. In total \_\_\_\_\_
- b. As a math teacher \_\_\_\_\_
- c. As a science teacher \_\_\_\_\_
- d. In a high school \_\_\_\_\_
- e. In a middle school \_\_\_\_\_
- f. In an elementary school \_\_\_\_\_
- g. Other, please specify \_\_\_\_\_  
\_\_\_\_\_

14. Do you have a teaching certificate in the state and/or city in which you are currently teaching?

Yes \_\_\_\_\_ No \_\_\_\_\_

15. During the last 12 months, have you participated in any professional development activities that focused on the following topics?

- a. In-depth study of your main subject area Yes \_\_\_\_\_ No \_\_\_\_\_
- b. Methods of teaching your main subject area Yes \_\_\_\_\_ No \_\_\_\_\_
- c. Applications of technology to education Yes \_\_\_\_\_ No \_\_\_\_\_
- d. Other related areas, specify: Yes \_\_\_\_\_ No \_\_\_\_\_  
\_\_\_\_\_

16. Not counting this summer program, have you participated in any professional development activities either in a laboratory, research or industrial setting in the last five years? If so, please describe this experience by providing the following information:

| name of program & sponsoring agency | type of setting (gov., univ. lab, industry) | dates and duration of program | type of work involved |
|-------------------------------------|---------------------------------------------|-------------------------------|-----------------------|
|                                     |                                             |                               |                       |
|                                     |                                             |                               |                       |
|                                     |                                             |                               |                       |

17. Please describe your post-secondary education by completing the chart below:

| DEGREE(S) HELD                 | YEAR | INSTITUTION | MAJOR | MINOR |
|--------------------------------|------|-------------|-------|-------|
| Bachelor's      Y   N          |      |             |       |       |
| Master's        Y   N          |      |             |       |       |
| Doctorate       Y   N          |      |             |       |       |
| Other (specify) Y   N<br>_____ |      |             |       |       |

18. Are you currently working towards an advanced degree? If yes, please specify:

Yes \_\_\_\_\_ No \_\_\_\_\_  
 Degree: \_\_\_\_\_ Institution: \_\_\_\_\_ Area: \_\_\_\_\_

## TEACHER CHARACTERISTICS

19. What is your sex?    Male \_\_\_\_\_                  Female \_\_\_\_\_

20. Which best describes you:

- a. American-Indian or Native Alaskan ..... 1
- b. Asian or Pacific Islander ..... 2
- c. Black, non-Hispanic ..... 3
- d. Hispanic ..... 4
- e. White, non-Hispanic ..... 5

*Thank you!*
